# Supplementary material for: Probenecid as a sensitizer of bisphosphonate-mediated effects in breast cancer cells
Source: PubMed Central journal article supplement (PMC4295226; doi:10.1186/1476-4598-13-265), 2014-12-11

MCF-7

T47D

MDA-MB-231

ANKH

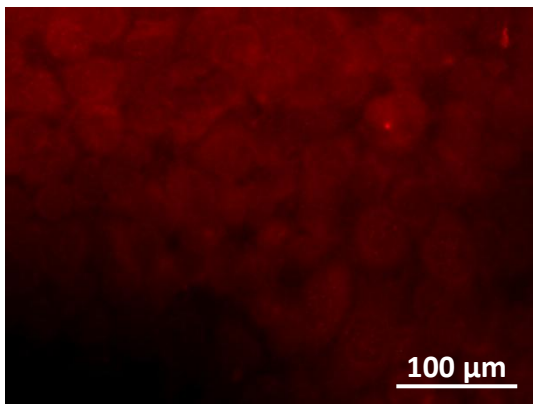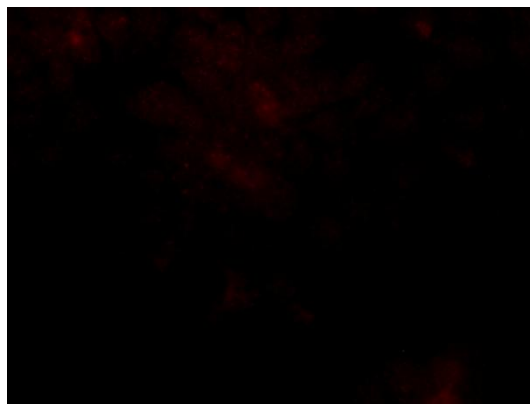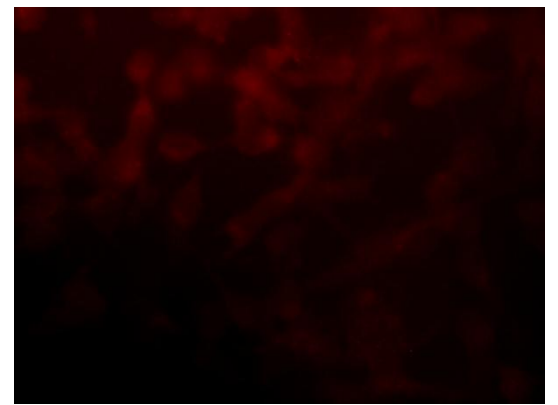

DAPI

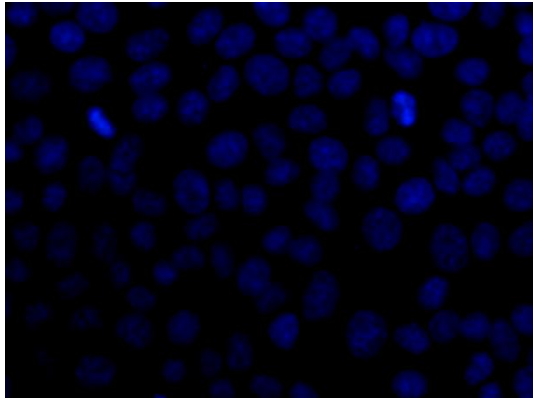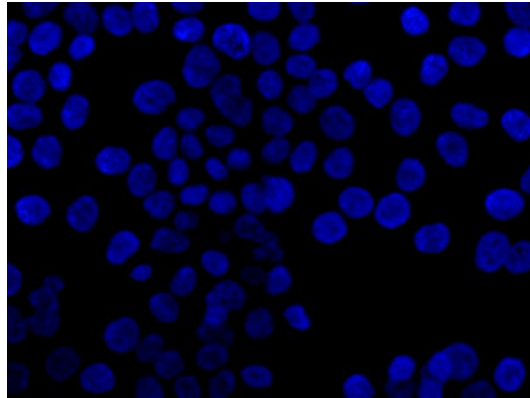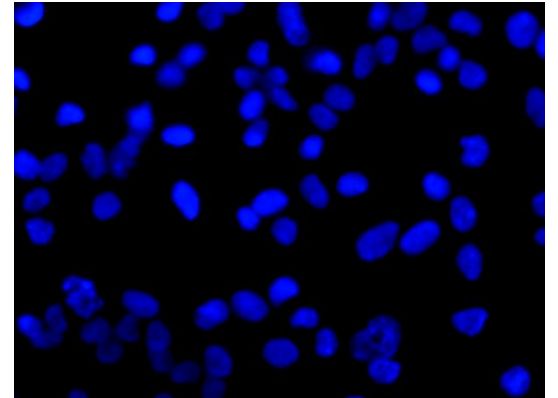

merge

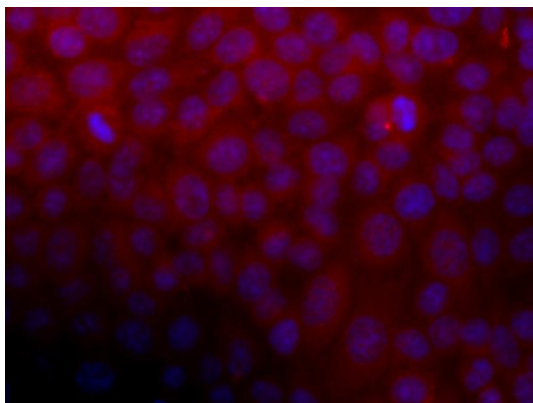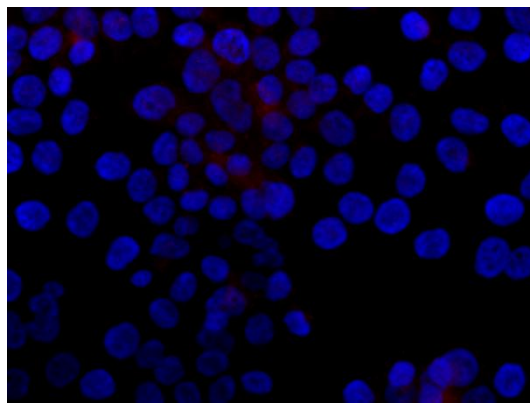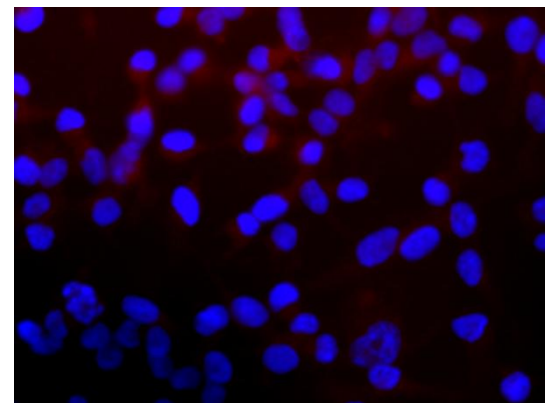

PANX1

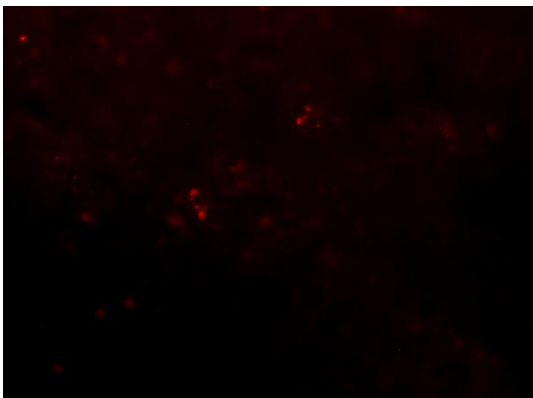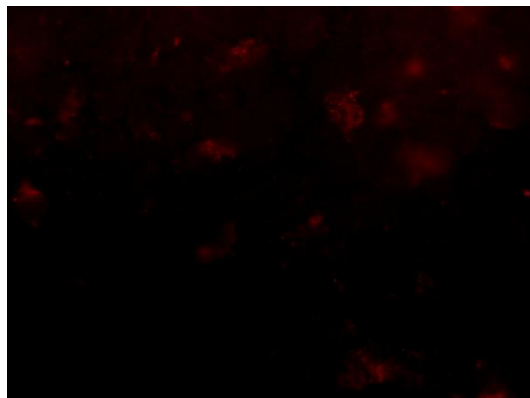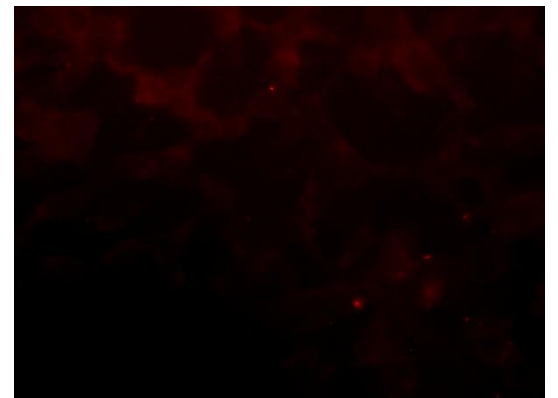

DAPI

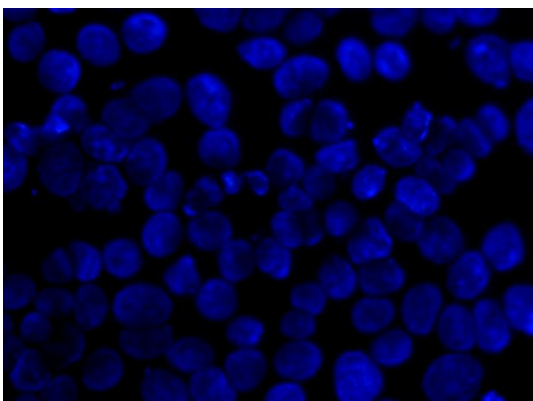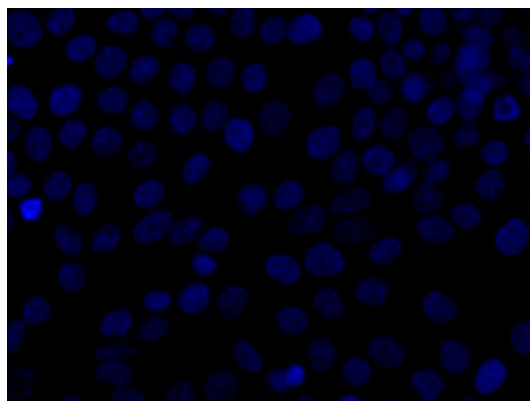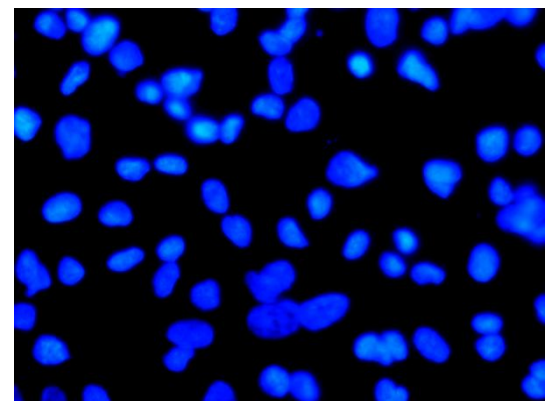

merge

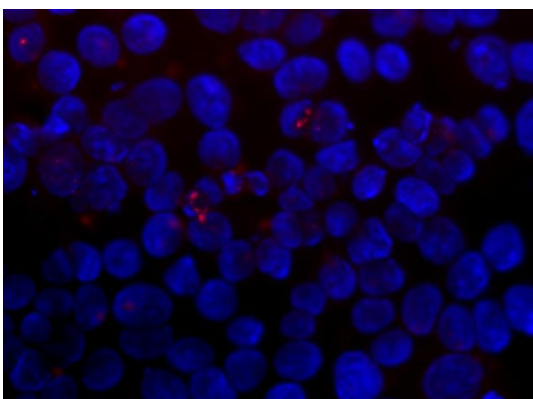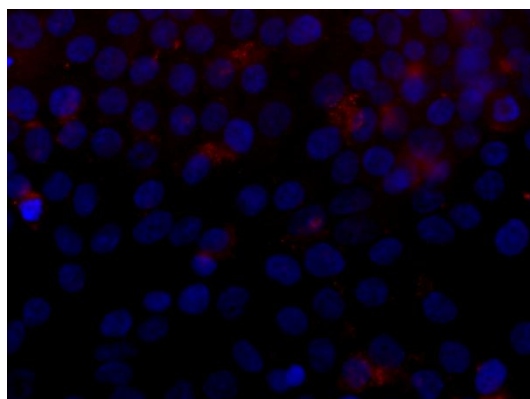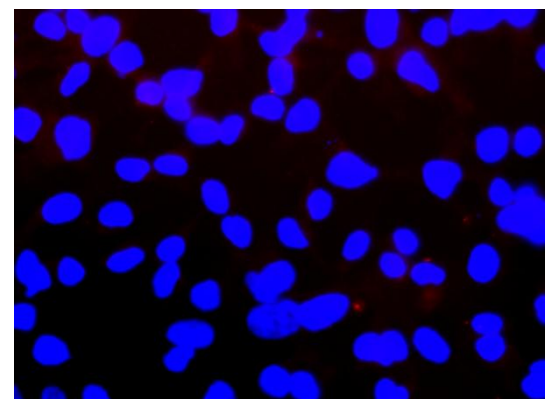

Supplement: 12943_2014_1463_MOESM1_ESM.pdf [file 12943_2014_1463_MOESM1_ESM.pdf]
